# Supplementary material
Source: publisher figshare collection journal article supplement (https://frontiersin.figshare.com/ndownloader/files/12269045)
Supplement: Supplementary file [file 12269045]

Supplementary Figure 1

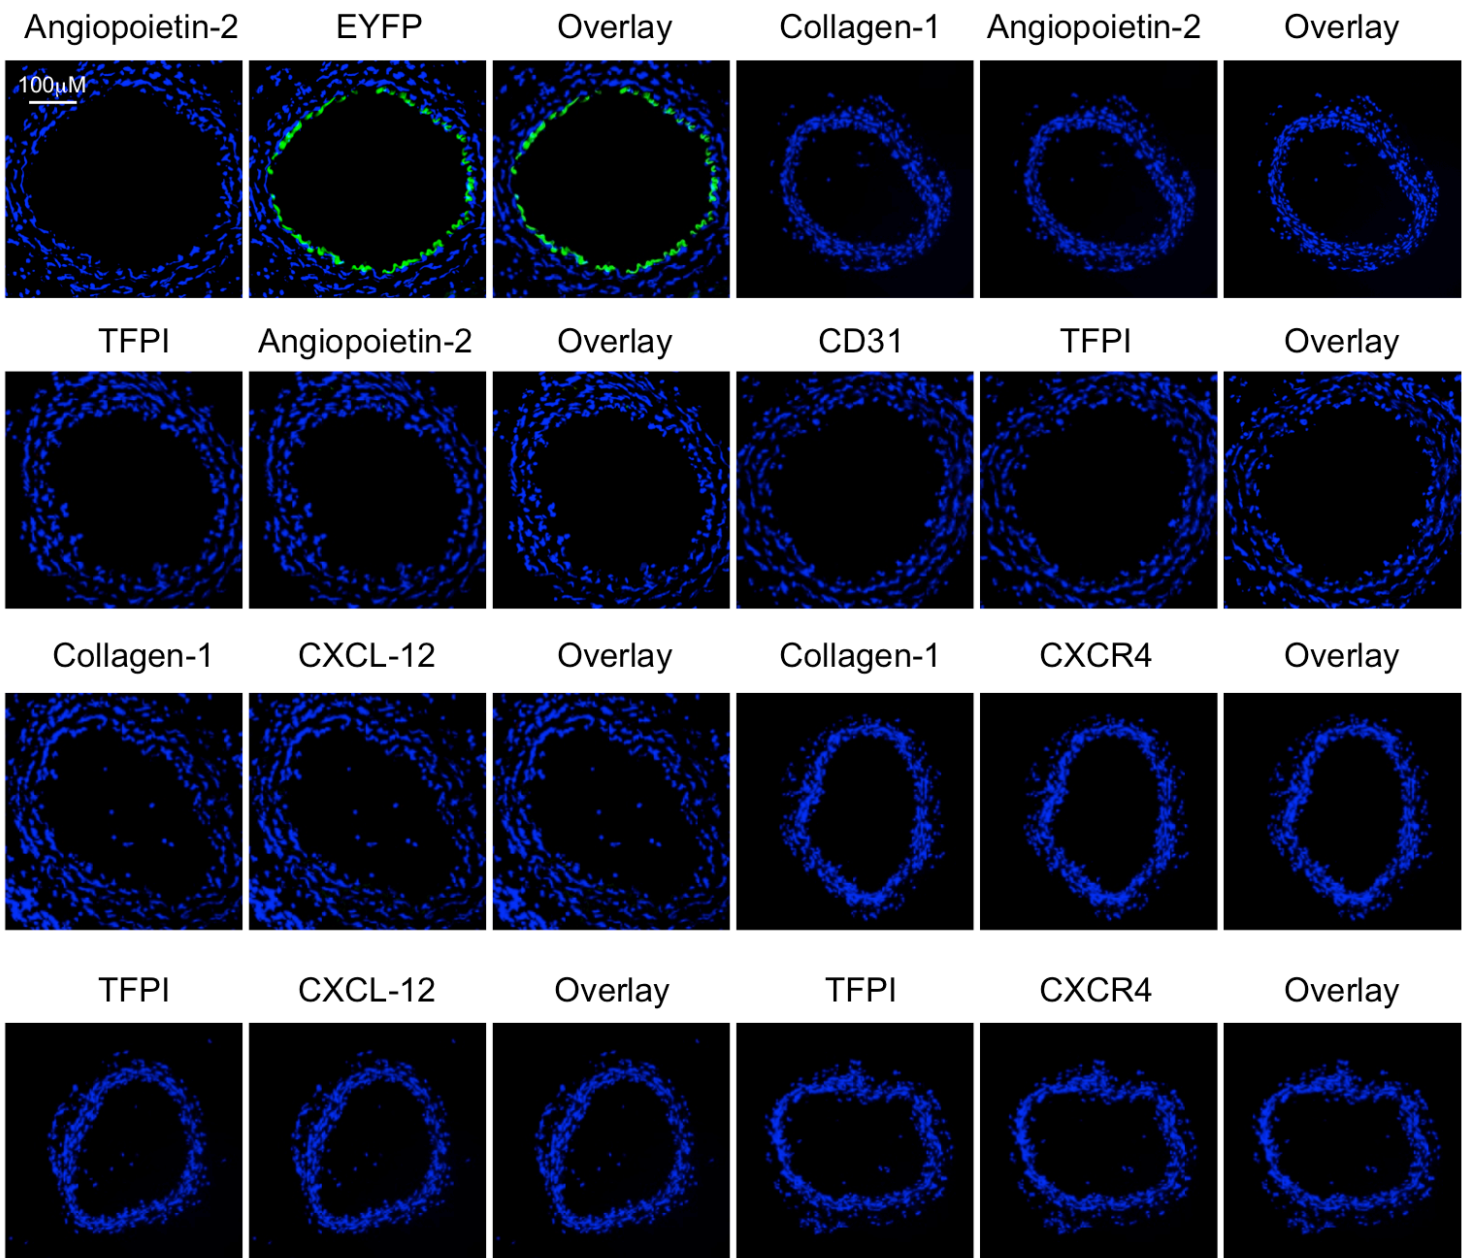

Figure Legend

*Supplementary figure 1: Isotype controls*  
Slide shows isotype control staining for all the specific antibodies used in immunofluorescence analyses in this study
